# Supplementary material
Source: publisher site journal article supplement (https://www.spandidos-publications.com/3400/downloadSupplementary)
Supplement: Supplementary file 1 [file downloadSupplementary]

## Sheet: Cerebral Ischemia
Table SII. Target genes associated with cerebral ischemia.
Gene	UniProt	Gene Full Name
CCL2	P13500	C-C motif chemokine ligand 2
MMP9	P14780	matrix metallopeptidase 9
BDNF	P23560	brain derived neurotrophic factor
F5	P12259	coagulation factor V
IL6	P05231	interleukin 6
SOD1	P00441	superoxide dismutase 1
CASP3	P42574	caspase 3
F2	P00734	coagulation factor II, thrombin
PLAT	P00750	plasminogen activator, tissue type
HIF1A	Q16665	hypoxia inducible factor 1 subunit alpha
IL1B	P01584	interleukin 1 beta
IL1RN	P18510	interleukin 1 receptor antagonist
IL1A	P01583	interleukin 1 alpha
TNF	P01375	tumor necrosis factor
ICAM1	P05362	intercellular adhesion molecule 1
MTHFR	P42898	methylenetetrahydrofolate reductase
NOS2	P35228	nitric oxide synthase 2
NFKB1	P19838	nuclear factor kappa B subunit 1
JUN	P05412	Jun proto-oncogene, AP-1 transcription factor subunit
PTGS2	P35354	prostaglandin-endoperoxide synthase 2
TP53	P04637	tumor protein p53
CXCL10	P02778	C-X-C motif chemokine ligand 10
EGR1	P18146	early growth response 1
IL18	Q14116	interleukin 18
BBC3	Q96PG8;Q9BXH1	BCL2 binding component 3
IL17A	Q16552	interleukin 17A
IL12RB1	P42701	interleukin 12 receptor subunit beta 1
GPX1	P07203	glutathione peroxidase 1
IL10RB	Q08334	interleukin 10 receptor subunit beta
IL17RA	Q96F46	interleukin 17 receptor A
CCL4	P13236;Q8NHW4	C-C motif chemokine ligand 4
SELE	P16581	selectin E
CCL11	P51671	C-C motif chemokine ligand 11
CCL3	P10147	C-C motif chemokine ligand 3
RELA	Q04206	RELA proto-oncogene, NF-kB subunit
RB1	P06400	RB transcriptional corepressor 1
TNFRSF1B	P20333	TNF receptor superfamily member 1B
MAP2K1	Q02750	mitogen-activated protein kinase kinase 1
MAPK3	P27361	mitogen-activated protein kinase 3
MAPK1	P28482	mitogen-activated protein kinase 1
UCP2	P55851	uncoupling protein 2
PLAU	P00749	plasminogen activator, urokinase
DYNLL1	P63167	dynein light chain LC8-type 1
NFKBIA	P25963	NFKB inhibitor alpha
SOD2	P04179	superoxide dismutase 2
MPO	P05164	myeloperoxidase
STAT3	P40763	signal transducer and activator of transcription 3
ADD3	Q9UEY8	adducin 3
CAT	P04040	catalase
DIABLO	Q9NR28	diablo IAP-binding mitochondrial protein
CCR4	P51679	C-C motif chemokine receptor 4
PARP1	P09874	poly(ADP-ribose) polymerase 1
TNFRSF1A	P19438	TNF receptor superfamily member 1A
ALB	P02768	albumin
CEBPB	P17676	CCAAT enhancer binding protein beta
CHRM1	P11229	cholinergic receptor muscarinic 1
CASP9	P55211	caspase 9
CYCS	P99999	cytochrome c, somatic
ACE	P12821	angiotensin I converting enzyme
ASIC1	P78348	acid sensing ion channel subunit 1
APP	P05067	amyloid beta precursor protein
COX2	P00403	cytochrome c oxidase subunit II
NOTCH3	Q9UM47	notch 3
CBS	P0DN79;P35520	cystathionine-beta-synthase
ND1	P03886	NADH dehydrogenase, subunit 1 (complex I)
PRTN3	P24158	proteinase 3
JAK2	O60674	Janus kinase 2
TRNH		tRNA
TRNL1		tRNA
COX3	P00414	cytochrome c oxidase III
GTF2IRD1	Q9UHL9	GTF2I repeat domain containing 1
RFC2	P35250	replication factor C subunit 2
TRNS1		tRNA
COX1	P00395	cytochrome c oxidase subunit I
ND4	P03905	NADH dehydrogenase, subunit 4 (complex I)
TRNS2		tRNA
ND5	P03915	NADH dehydrogenase, subunit 5 (complex I)
TRNW		tRNA
ND6	P03923	NADH dehydrogenase, subunit 6 (complex I)
TRNQ		tRNA
TRNF		tRNA
LIMK1	P53667	LIM domain kinase 1
BAZ1B	Q9UIG0	bromodomain adjacent to zinc finger domain 1B
GTF2I	P78347	general transcription factor IIi
TBL2	Q9Y4P3	transducin beta like 2
HLA-DPB1	P04440	major histocompatibility complex, class II, DP beta 1
CTLA4	P16410	cytotoxic T-lymphocyte associated protein 4
PTPN22	Q9Y2R2	protein tyrosine phosphatase, non-receptor type 22
SCNN1G	P51170	sodium channel epithelial 1 gamma subunit
CLIP2	Q9UDT6	CAP-Gly domain containing linker protein 2
ELN	P15502	elastin
SCNN1B	P51168	sodium channel epithelial 1 beta subunit
VEGFA	P15692	vascular endothelial growth factor A
NGB	Q9NPG2	neuroglobin
HSPA4	P34932	heat shock protein family A (Hsp70) member 4
BCL2	P10415	BCL2, apoptosis regulator
APOE	P02649	apolipoprotein E
TNFRSF12A	Q9NP84	TNF receptor superfamily member 12A
TLR4	O00206	toll like receptor 4
PLA2G4A	P47712	phospholipase A2 group IVA
HSPB3	Q12988	heat shock protein family B (small) member 3
HSPB2	Q16082	heat shock protein family B (small) member 2
HSPB1	P04792	heat shock protein family B (small) member 1
ANGPT1	Q15389	angiopoietin 1
SP1	P08047	Sp1 transcription factor
SETD2	Q9BYW2	SET domain containing 2
ODC1	P11926	ornithine decarboxylase 1
NR3C2	P08235	nuclear receptor subfamily 3 group C member 2
ADM	P35318	adrenomedullin
REST	Q13127	RE1 silencing transcription factor
KAT5	Q92993	lysine acetyltransferase 5
KIDINS220	Q9ULH0	kinase D interacting substrate 220
NOS3	P29474	nitric oxide synthase 3
HSPA1B	P0DMV8;P0DMV9	heat shock protein family A (Hsp70) member 1B
HSPA1A	P0DMV8;P0DMV9	heat shock protein family A (Hsp70) member 1A
HMGB1	P09429	high mobility group box 1
NTF3	P20783	neurotrophin 3
RPL13A	P40429	ribosomal protein L13a
MBL2	P11226	mannose binding lectin 2
PWAR4		Prader Willi/Angelman region RNA 4
YWHAZ	P63104	tyrosine 3-monooxygenase/tryptophan 5-monooxygenase activation protein zeta
NUP214	P35658	nucleoporin 214
PIK3R3	Q92569	phosphoinositide-3-kinase regulatory subunit 3
VDR	P11473	vitamin D receptor
STC1	P52823	stanniocalcin 1
ABCC8	Q09428	ATP binding cassette subfamily C member 8
TAT	P17735	tyrosine aminotransferase
TGFBR2	P37173	transforming growth factor beta receptor 2
TIMP3	P35625	TIMP metallopeptidase inhibitor 3
PGR-AS1		PGR antisense RNA 1
TM7SF2	O76062	transmembrane 7 superfamily member 2
VWF	P04275	von Willebrand factor
C20orf181		chromosome 20 open reading frame 181
MIR424		microRNA 424
HSPA12B	Q96MM6	heat shock protein family A (Hsp70) member 12B
MIR320A		microRNA 320a
TRAF1	Q13077	TNF receptor associated factor 1
MIR29B2		microRNA 29b-2
MIR29B1		microRNA 29b-1
MIR210		microRNA 210
NRP1	O14786	neuropilin 1
NRN1	Q9NPD7	neuritin 1
SIRT1	Q96EB6	sirtuin 1
RIPK3	Q9Y572	receptor interacting serine/threonine kinase 3
EBP	Q15125	EBP, cholestenol delta-isomerase
SEMA6A	Q9H2E6	semaphorin 6A
IL21	Q9HBE4	interleukin 21
GPNMB	Q14956	glycoprotein nmb
SRR	Q9GZT4	serine racemase
SEMA3A	Q14563	semaphorin 3A
BACE1	P56817	beta-secretase 1
KIAA1147	A4D1U4	KIAA1147
PHGDH	O43175	phosphoglycerate dehydrogenase
GOLT1B	Q9Y3E0	golgi transport 1B
ASCC1	Q8N9N2	activating signal cointegrator 1 complex subunit 1
ISYNA1	Q9NPH2	inositol-3-phosphate synthase 1
IL22	Q9GZX6	interleukin 22
HTRA2	O43464	HtrA serine peptidase 2
IL17C	Q9P0M4	interleukin 17C
CBSL	P0DN79;P35520	cystathionine-beta-synthase like
TRPM7	Q96QT4	transient receptor potential cation channel subfamily M member 7
NDRG4	Q9ULP0	NDRG family member 4
PINK1	Q9BXM7	PTEN induced putative kinase 1
CARTPT	Q16568	CART prepropeptide
AKT1S1	Q96B36	AKT1 substrate 1
GOLT1A	Q6ZVE7	golgi transport 1A
F2RL3	Q96RI0	F2R like thrombin or trypsin receptor 3
ARHGEF7	Q14155	Rho guanine nucleotide exchange factor 7
PROZ	P22891	protein Z, vitamin K dependent plasma glycoprotein
ZBTB7C	A1YPR0	zinc finger and BTB domain containing 7C
RIPK1	Q13546	receptor interacting serine/threonine kinase 1
ZRANB3	Q5FWF4	zinc finger RANBP2-type containing 3
ANGPTL1	O95841	angiopoietin like 1
SLC33A1	O00400	solute carrier family 33 member 1
RAMP2	O60895	receptor activity modifying protein 2
RNF146	Q9NTX7	ring finger protein 146
NAMPT	P43490	nicotinamide phosphoribosyltransferase
EDIL3	O43854	EGF like repeats and discoidin domains 3
KLK4	Q9Y5K2	kallikrein related peptidase 4
ADAMTS1	Q9UHI8	ADAM metallopeptidase with thrombospondin type 1 motif 1
ADIPOQ	Q15848	adiponectin, C1Q and collagen domain containing
MSC	O60682	musculin
NPAS4	Q8IUM7	neuronal PAS domain protein 4
TLX2	O43763	T cell leukemia homeobox 2
MARK2	Q7KZI7	microtubule affinity regulating kinase 2
EDNRB	P24530	endothelin receptor type B
HBEGF	Q99075	heparin binding EGF like growth factor
DSCAM	O60469	DS cell adhesion molecule
DLG4	P78352	discs large MAGUK scaffold protein 4
DECR1	Q16698	2,4-dienoyl-CoA reductase 1
DDIT3	P35638	DNA damage inducible transcript 3
DBP	Q10586	D-box binding PAR bZIP transcription factor
CYBB	P04839	cytochrome b-245 beta chain
EMP1	P54849	epithelial membrane protein 1
EPO	P01588	erythropoietin
H2AFX	P16104	H2A histone family member X
GRIK2	Q13002	glutamate ionotropic receptor kainate type subunit 2
GRN	P28799	granulin precursor
GOT1	P17174	glutamic-oxaloacetic transaminase 1
GFAP	P14136	glial fibrillary acidic protein
GABPA	Q06546	GA binding protein transcription factor subunit alpha
FOSB	P53539	FosB proto-oncogene, AP-1 transcription factor subunit
FOS	P01100	Fos proto-oncogene, AP-1 transcription factor subunit
F2R	P25116	coagulation factor II thrombin receptor
CTSG	P08311	cathepsin G
CSF2	P04141	colony stimulating factor 2
MAPK14	Q16539	mitogen-activated protein kinase 14
CEACAM1	P13688	carcinoembryonic antigen related cell adhesion molecule 1
ADGRB2	O60241	adhesion G protein-coupled receptor B2
ATM	Q13315	ATM serine/threonine kinase
AQP4	P55087	aquaporin 4
APRT	P07741	adenine phosphoribosyltransferase
ALDH2	P05091	aldehyde dehydrogenase 2 family member
AGTR1	P30556	angiotensin II receptor type 1
AGT	P01019	angiotensinogen
AGER	Q15109	advanced glycosylation end-product specific receptor
CALM1	P0DP23;P0DP24;P0DP25	calmodulin 1
CALM2	P0DP23;P0DP24;P0DP25	calmodulin 2
CREB1	P16220	cAMP responsive element binding protein 1
CNR2	P34972	cannabinoid receptor 2
CIRBP	Q14011	cold inducible RNA binding protein
CD40	P25942	CD40 molecule
CD14	P08571	CD14 molecule
CCNH	P51946	cyclin H
CASP6	P55212	caspase 6
CAPN1	P07384	calpain 1
CALM3	P0DP23;P0DP24;P0DP25	calmodulin 3
ABO	P16442	ABO, alpha 1-3-N-acetylgalactosaminyltransferase and alpha 1-3-galactosyltransferase
HSPA2	P54652	heat shock protein family A (Hsp70) member 2
SLC8A1	P32418	solute carrier family 8 member A1
PTGER1	P34995	prostaglandin E receptor 1
PSPN	O60542	persephin
MAP2K7	O14733	mitogen-activated protein kinase kinase 7
PPARG	P37231	peroxisome proliferator activated receptor gamma
POU5F1	Q01860	POU class 5 homeobox 1
PLSCR1	O15162	phospholipid scramblase 1
PLG	P00747	plasminogen
PIK3CG	P48736	phosphatidylinositol-4,5-bisphosphate 3-kinase catalytic subunit gamma
PIK3CD	O00329	phosphatidylinositol-4,5-bisphosphate 3-kinase catalytic subunit delta
RAC1	P63000	Rac family small GTPase 1
REN	P00797	renin
SLC1A2	P43004	solute carrier family 1 member 2
SHH	Q15465	sonic hedgehog
SGK1	O00141	serum/glucocorticoid regulated kinase 1
SFTPD	P35247	surfactant protein D
SELP	P16109	selectin P
CXCL12	P48061	C-X-C motif chemokine ligand 12
CX3CL1	P78423	C-X3-C motif chemokine ligand 1
LMO1	P25800	LIM domain only 1
ROS1	P08922	ROS proto-oncogene 1, receptor tyrosine kinase
PIK3CB	P42338	phosphatidylinositol-4,5-bisphosphate 3-kinase catalytic subunit beta
PIK3CA	P42336	phosphatidylinositol-4,5-bisphosphate 3-kinase catalytic subunit alpha
SERPINI1	Q99574	serpin family I member 1
KCNK3	O14649	potassium two pore domain channel subfamily K member 3
KCNK2	O95069	potassium two pore domain channel subfamily K member 2
KCNJ13	O60928	potassium voltage-gated channel subfamily J member 13
KCNA3	P22001	potassium voltage-gated channel subfamily A member 3
JUND	P17535	JunD proto-oncogene, AP-1 transcription factor subunit
JUNB	P17275	JunB proto-oncogene, AP-1 transcription factor subunit
ITGAL	P20701	integrin subunit alpha L
IL16	Q14005	interleukin 16
IL10	P22301	interleukin 10
KDR	P35968	kinase insert domain receptor
MBP	P02686	myelin basic protein
SERPINB6	P35237	serpin family B member 6
PGF	P49763	placental growth factor
PAWR	Q96IZ0	pro-apoptotic WT1 regulator
SERPINE1	P05121	serpin family E member 1
OAZ1	P54368	ornithine decarboxylase antizyme 1
NPPA	P01160	natriuretic peptide A
NFE2L2	Q16236	nuclear factor, erythroid 2 like 2
MAP3K11	Q16584	mitogen-activated protein kinase kinase kinase 11
MAP3K5	Q99683	mitogen-activated protein kinase kinase kinase 5
IGF1	P05019	insulin like growth factor 1
